# Supplementary material for: Micro-Scale Genomic DNA Copy Number Aberrations as Another Means of Mutagenesis in Breast Cancer
Source: PLoS One. 2012 Dec 17;7(12):e51719. doi: 10.1371/journal.pone.0051719 (PMC3524128; doi:10.1371/journal.pone.0051719)
Supplement: Table S1 — Clinical data table. Table containing all information on the human breast samples used in this study including outcomes data, microarray and GEO accession number IDs. (XLSX) [file pone.0051719.s005.xlsx]

## Sheet: Sheet1
GEO array names	Slide Name	Tiling Array Name	Tiling Array Slide Name	Age	ER (1=positive; 0=negative)	Node status (1=positive=1 or more nodes+; 0=negative)	Grade	Size (1= <=2cm; 2= >2cm to <=5cm; 3=>5cm; 4=any size with direct extension to chest wall or skin)	RFS event (0=no relapse, 1=relapsed at any site or died of disease)	RFS months	Overall Survival Event (0=alive, 1=DOD or DOC)	Overall suvival months	PAM50 Subtype plus Claudin-low	PAM50 Subtype	GSMs (Expression)	GSMs (aCGH)	GPL (Expression)	GPL (aCGH)
BR-99-0622	HIA-7871-V2-2253	990622B-244k-customCGH	252042110161-244k	49	0	1	3	2	1	22	1	34	LumB	LumB	GSM81185	GSM899775	GPL887	GPL15359
9830-030446B	H1AUNC-0935-C	030446B-244k-customCGH	252042110047-244k	55	1	0	2	2	0	12	0	12	LumA	LumA	GSM81175	GSM898614	GPL1390	GPL15359
BC00017-T	H1AUNC-0789-C	BC17T-244k-customCGH	252042110163-244k	41	1	1	NA	3	1	2	1	8	LumB	LumB	GSM81167	GSM899777	GPL1390	GPL15359
BC00016-T	H1AUNC-0788-C	BC16T-244k-customCGH	252042110162-244k	64	1	1	NA	2	1	17	1	56	LumB	LumB	GSM81166	GSM899776	GPL1390	GPL15359
BC00097	H1A9529-0091C	BC00097T-244k-customCGH	252042110082-244k	40	0	1	3	2	NA	NA	NA	NA	Her2	Her2	GSM80237	GSM899631	GPL1390	GPL15359
BC00094T	H1A4110_3582	BC00094T-244k-customCGH	252042110115-244k	51	0	0	3	2	NA	NA	NA	NA	Basal	Basal	GSM80236	GSM899645	GPL885	GPL15359
BC00086	H1A6261-2087V2	BC86T-244k-customCGH	252042110005-244k	25	0	1	3	2	0	9	0	9	Basal	Basal	GSM80235	GSM897826	GPL887	GPL15359
BC00083	H1A6546-126	BC00083-244k-customCGH	252042110107-244k	43	0	1	3	2	1	33	0	36	Claudin	Her2	GSM80234	GSM899639	GPL885	GPL15359
BC00063	H1A9529-041C	BC00063T-244k-customCGH	252042110081-244k	36	0	1	3	4	NA	NA	NA	NA	Claudin	Her2	GSM80230	GSM899630	GPL1390	GPL15359
A6-Liver-Met	H1A7871-2410V2	A6-1 LivMet-244k-customCGH	252042110110-244k	53	1	1	3	2	1	1	1	16	LumB	LumB	GSM80223	GSM899640	GPL887	GPL15359
9830-020018B	H1AUNC-1018-C	9830-020018B-244k-customCGH	252042110087-244k	55	0	0	3	2	0	31	0	31	Claudin	Basal	GSM80221	GSM899634	GPL1390	GPL15359
9830-010384B	H1AUNC-1017-C	010384-244k-customCGH	252042110102-244k	34	0	1	3	2	0	32	0	32	Claudin	Basal	GSM80220	GSM899635	GPL1390	GPL15359
9830-010255B	H1AUNC-1016-C	9830-010255B-244k-customCGH	252042110091-244k	49	0	0	3	2	0	35	0	35	LumA	LumA	GSM80219	GSM899626	GPL1390	GPL15359
9830-010214B	H1AUNC-1007-C	9830-010214B-244k-customCGH	252042110072-244k	57	0	0	3	1	0	37	0	37	Basal	Basal	GSM80218	GSM899620	GPL1390	GPL15359
9830-010130B	H1AUNC-1006-C	9830-010130B-244k-customCGH	252042110071-244k	39	0	0	3	2	0	44	0	44	Basal	Basal	GSM80217	GSM899619	GPL1390	GPL15359
9830-010118B	H1AUNC-1005-C	9830-010118B-244k-customCGH	252042110070-244k	47	0	1	3	3	0	41	0	41	Basal	Basal	GSM80216	GSM899618	GPL1390	GPL15359
030311-BC-Brain-Met	H1A6730-744	030311B-244k-customCGH	252042110105-244k	48	1	0	3	2	1	28	0	51	LumB	LumB	GSM80214	GSM899638	GPL885	GPL15359
9830-020416B	H1AUNC-1015-C	020416B-244k-customCGH-repeat	252042110054-244k	70	1	0	2	1	0	5	0	5	LumB	LumB	GSM53481	GSM898625	GPL1390	GPL15359
9830-020340B	H1AUNC-1014-C	9830-020340B-244k-customCGH	252042110078-244k	76	1	1	2	3	0	23	0	23	LumB	LumB	GSM53480	GSM899627	GPL1390	GPL15359
9830-000471B	H1AUNC-1000-C	000471B-244k-customCGH-repeat	252042110052-244k	81	1	0	NA	2	1	46	0	47	LumA	LumA	GSM53479	GSM898619	GPL1390	GPL15359
9830-000424B	H1AUNC-0998-C	000424B-244k-customCGH-repeat	252042110051-244k	48	1	0	2	1	0	38	0	38	LumA	LumA	GSM53478	GSM898618	GPL1390	GPL15359
A8-Caudaequina-Met	H1A4956V2_Na	A8-SpiCordMet-244k-customCGH	252042110080-244k	46	1	1	2	2	1	1	1	44	Her2	Her2	GSM52919	GSM899629	GPL887	GPL15359
9830-020461B	H1AUNC-0933-C	020461B-244k-customCGH	252042110046-244k	75	1	0	3	2	0	23	0	23	LumA	LumA	GSM52894	GSM898613	GPL1390	GPL15359
9830-020310B	H1AUNC-1011-C	9830-020310B-244k-customCGH-repeat	252042110057-244k	40	1	0	2	3	0	24	0	24	LumB	LumB	GSM52893	GSM898623	GPL1390	GPL15359
9830-020185B	H1AUNC-1010-C	020185B-244k-customCGH-repeat	252042110053-244k	58	1	1	1	3	0	26	0	26	LumA	LumA	GSM52892	GSM898620	GPL1390	GPL15359
9830-000517B	H1AUNC-1004-C	9830-000517B-244k-customCGH-repeat	252042110056-244k	44	0	0	NA	2	0	42	0	42	LumB	LumB	GSM52888	GSM898622	GPL1390	GPL15359
9830-000248B	H1AUNC-0997-C	000248B-244k-customCGH-repeat	252042110050-244k	37	1	1	3	1	0	48	0	48	LumB	LumB	GSM52887	GSM898617	GPL1390	GPL15359
9830-000060B	H1AUNC-1012-C	9830-000060B-244k-customCGH-repeat	252042110055-244k	79	1	0	2	2	0	53	0	53	LumA	LumA	GSM52885	GSM898621	GPL1390	GPL15359
UNC00-0552B-44K	H1AUNC44K-H1-0559	000552B-244k-customCGH	252042110113-244k	56	1	1	3	4	0	22	0	22	Claudin	Normal	GSM373123	GSM899643	GPL5325	GPL15359
9830-030399B	A44K11240-2741	9830-030399B-244k-customCGH	252042110074-244k	53	1	0	2	2	0	32	0	32	LumB	LumB	GSM373121	GSM899621	GPL1708	GPL15359
9830-030584B	A44K10829-1281	9830-030584B-244k-customCGH	252042110075-244k	54	1	1	NA	1	0	21	0	21	LumA	LumA	GSM373116	GSM899622	GPL1708	GPL15359
9830-030118B	A44K10829-1192	030118B-244k-customCGH	252042110126-244k	69	1	0	1	3	1	14	1	14	LumA	LumA	GSM373115	GSM899729	GPL1708	GPL15359
BC00024T	H1A_C_0077	BC24T-244k-customCGH	252042110022-244k	68	0	1	3	3	1	3	1	3	Basal	Basal	GSM34559	GSM897970	GPL1390	GPL15359
BC00082T	H1A4110_3580	BC82T-244k-customCGH	252042110049-244k	84	0	0	3	2	0	27	1	27	Basal	Basal	GSM34552	GSM898616	GPL885	GPL15359
BR99-0207-GATA3	H1A7411-0066-C	BR-990207B-244k-customCGH	252042110060-244k	84	1	1	2	2	0	57	0	57	LumB	LumB	GSM34546	GSM898626	GPL1390	GPL15359
BR00-0387	H1A9529-025C_Na	BR-000387B-244k-customCGH	252042110132-244k	57	1	1	2	4	1	6	0	51	LumA	LumA	GSM34541	GSM899731	GPL1390	GPL15359
BC00070	H1A9529-0096C	BC70T-244k-customCGH	252042110024-244k	38	0	0	2	2	1	22	1	25	Basal	Basal	GSM34538	GSM897972	GPL1390	GPL15359
BC00043T	H1A_C_0080	BC43T-repeat-244k-customCGH	252042110147-244k	43	0	0	3	2	0	76	0	76	Basal	Basal	GSM34535	GSM899778	GPL1390	GPL15359
BC00041	H1A9529-039C	BC41T-244k-customCGH	252042110048-244k	46	0	0	3	2	1	13	1	29	Basal	Basal	GSM34534	GSM898615	GPL1390	GPL15359
BR00-0344	H1A9529-028C_Na	BR000344B-244k-customCGH	252042110118-244k	65	1	1	3	2	1	7	1	30	LumB	LumB	GSM34540	GSM899648	GPL1390	GPL15359
BC00085	H1A6260-732	BC85T-244k-customCGH-repeat	252042110026-244k	24	0	0	2	1	0	19	0	19	Basal	Basal	GSM34509	GSM897973	GPL885	GPL15359
BR01-0349	H1A9529-0047C	BR-010349B-244k-customCGH	252042110083-244k	37	1	1	3	3	1	3	1	24	LumB	LumB	GSM34486	GSM899632	GPL1390	GPL15359
BR00-0572-VIM	H1A6433-2599V2	BR00-0572B-244k-customCGH-repeat	252042110058-244k	45	0	1	3	3	1	11	0	42	Basal	Basal	GSM34484	GSM898624	GPL887	GPL15359
BC00029T	H1A_C_0078	BC29T-244k-customCGH	252042110023-244k	44	0	1	3	NA	0	62	0	62	Basal	Basal	GSM34479	GSM897971	GPL1390	GPL15359
A1-17-Left-Primary-VIM	H1A9529-0094C	A1-17-244k-customCGH-repeat	252042110002-244k	64	0	1	3	4	1	2	1	2	Basal	Basal	GSM21709	GSM897824	GPL1390	GPL15359
A4-LLL-Lung-Met	H1A6912-6852V2	A4-LLLmet-244k-customCGH	252042110079-244k	44	1	1	3	4	1	22	1	22	Her2	Her2	GSM34467	GSM899628	GPL887	GPL15359
BR95-0184	H1A6912-6986V2	BR950184B-244k-customCGH	252042110116-244k	74	1	0	3	2	0	96	0	96	LumB	LumB	GSM34462	GSM899646	GPL887	GPL15359
BR99-0348-GATA3	H1A9529-0051C	BR990348B-244k-customCGH	252042110077-244k	85	1	0	2	2	0	32	0	32	LumA	LumA	GSM34455	GSM899624	GPL1390	GPL15359
BR00-0587-GATA3	H1A6433-2990V2	BR-000587B-244k-customCGH	252042110085-244k	68	1	0	3	2	0	37	0	37	LumA	LumA	GSM34430	GSM899633	GPL887	GPL15359
BR97-0137-VIM	H1A6261-1489V2	BR-990137B-244k-customCGH	252042110062-244k	55	0	1	3	3	1	20	1	21	Basal	Basal	GSM34429	GSM899616	GPL887	GPL15359
BR00-0284	H1A6433-2611V2	BR000284B-244k-customCGH	252042110119-244k	63	0	0	3	3	0	43	0	43	Her2	Her2	GSM34425	GSM899649	GPL887	GPL15359
BR00-0504	H1A6433-2988V2	BR000504B-244k-customCGH	252042110076-244k	88	1	1	1	2	0	39	0	39	LumA	LumA	GSM34424	GSM899623	GPL887	GPL15359
A5-Skin#1-Right-Met	H1A6912-6853V2	A5-244k-customCGH	252042110003-244k	65	0	1	3	4	1	26	1	26	Basal	Basal	GSM34468	GSM897825	GPL887	GPL15359
00-0161B-Genomic-Core	H1AUNC-1121C	UNC000161B-244k-customCGH	252042110090-244k	NA	NA	NA	NA	NA	NA	NA	NA	NA	Basal	Basal	GSM275694	GSM899625	GPL1390	GPL15359
UNC-040182B	H1AUNC-1323-C	UNC040182B-244k-customCGH	252042110039-244k	88	1	1	3	2	0	16	0	16	LumB	LumB	GSM141117	GSM897965	GPL1390	GPL15359
UNC-040134B	H1AUNC-1235-C	UNC-040134B-244k-customCGH	252042110020-244k	65	1	0	2	2	0	20	0	20	LumA	LumA	GSM141115	GSM897969	GPL1390	GPL15359
UNC-040114B-core	H1AUNC-1088-C-Na	UNC040114B-244k-customCGH	252042110038-244k	56	1	0	2	2	0	16	0	16	LumB	LumB	GSM141114	GSM897964	GPL1390	GPL15359
UNC-030459B-BRCA1	H1AUNC-1242-C	UNC030459B-244k-customCGH	252042110030-244k	30	0	0	3	3	1	28	0	37	Claudin	Basal	GSM141110	GSM897977	GPL1390	GPL15359
UNC-030408B-core	H1AUNC-1090-C-Na	UNC-030408B-244k-customCGH	252042110017-244k	37	0	0	3	2	1	10	0	25	Basal	Basal	GSM141108	GSM897966	GPL1390	GPL15359
UNC-030065B	H1AUNC-1239-C	030065B-244k-customCGH	252042110125-244k	66	0	0	3	4	1	25	1	28	Claudin	Normal	GSM141106	GSM899728	GPL1390	GPL15359
UNC-020510B--	H1AUNC-1322-C	UNC020510B-244k-customCGH	252042110027-244k	61	0	0	3	2	0	34	0	34	Basal	Basal	GSM141103	GSM897974	GPL1390	GPL15359
UNC-020242B	H1AUNC-1317-C	UNC020242B-244k-customCGH	252042110029-244k	49	0	0	3	1	0	31	0	31	Basal	Basal	GSM141097	GSM897976	GPL1390	GPL15359
UNC-010509B	H1AUNC-0765-C-Na	010509B-244k-customCGH	252042110130-244k	84	1	0	2	2	0	46	0	46	Normal	Normal	GSM141095	GSM899730	GPL1390	GPL15359
UNC-010208B	H1AUNC-0761-C-Na	UNC010208B-244k-customCGH	252042110028-244k	50	0	0	3	2	0	51	0	51	Claudin	Basal	GSM141091	GSM897975	GPL1390	GPL15359
010456B-Genomic-Core	H1AUNC-1125C	UNC-010456B-244k-customCGH	252042110019-244k	60	1	0	3	2	1	38	0	48	LumB	LumB	GSM141002	GSM897968	GPL1390	GPL15359
010353B-Genomic-Core	H1AUNC-1124C	UNC-010353B-244k-customCGH	252042110018-244k	60	0	0	3	2	0	12	0	12	LumA	LumA	GSM141001	GSM897967	GPL1390	GPL15359
940326B	Agilent 251976011245 244Kv5	940326B-244k-customCGH	252042110136-244k	64	0	0	NA	2	0	177	0	177	Basal	Basal	GSM904703	GSM899732	GPL8269	GPL15359
950094B	Agilent 251976011248 244Kv5	950094B-244k-customCGH	252042110139-244k	38	1	0	3	3	1	18	1	40	LumA	LumA	GSM904705	GSM899733	GPL8269	GPL15359
950105B	Agilent 251976011249 244Kv5	950105B-244k-customCGH	252042110140-244k	30	0	0	NA	1	0	159	0	159	Basal	Basal	GSM904707	GSM899734	GPL8269	GPL15359
950165B	Agilent 251976011250 244Kv5	950165B-244k-customCGH	252042110141-244k	33	0	0	3	2	1	11	1	12	Her2	Her2	GSM904701	GSM899735	GPL8269	GPL15359
950185B	Agilent 251976011255 244Kv5	950185B-244k-customCGH	252042110142-244k	33	0	1	3	3	1	9	1	19	Basal	Basal	GSM904706	GSM899736	GPL8269	GPL15359
960047B-244Kv5	H244Kv5-251976013108-960047	960047B-244k-customCGH	252042110143-244k	52	0	0	2	1	1	0	1	21	Her2	Her2	GSM904712	GSM899737	GPL8269	GPL15359
960096B	Agilent 251976011252 244Kv5	960096B-244k-customCGH	252042110144-244k	67	1	1	2	3	1	60	1	112	LumA	LumA	GSM904702	GSM899738	GPL8269	GPL15359
960606B	Agilent 251976011253 244Kv5	960606B-244k-customCGH	252042110150-244k	85	0	1	3	3	1	153	1	153	Normal	Normal	GSM904704	GSM899739	GPL8269	GPL15359
970055B-244Kv5	H244Kv5-251976013109-970055	970055B-244k-customCGH	252042110151-244k	32	NA	0	3	2	0	113	0	113	Claudin	Basal	GSM904713	GSM899740	GPL8269	GPL15359
970105B-244Kv5	H244Kv5-251976013110-970105	970105B-244k-customCGH	252042110152-244k	51	1	1	2	3	0	60	0	60	LumA	LumA	GSM904715	GSM899741	GPL8269	GPL15359
971069B	Test 251976011605 244Kv5	971069B-244k-customCGH	252042110153-244k	53	1	1	2	1	1	76	1	121	LumA	LumA	GSM904710	GSM899742	GPL8269	GPL15359
971083B-244Kv5	H244Kv5-251976013112-971083	971083B-244k-customCGH	252042110154-244k	44	NA	1	3	1	0	133	0	133	Her2	Her2	GSM904714	GSM899765	GPL8269	GPL15359
971091B	Test 251976011606 244Kv5	971091B-244k-customCGH	252042110166-244k	51	1	1	1	2	0	21	0	21	LumA	LumA	GSM904711	GSM899766	GPL8269	GPL15359
971103B-244Kv5	H244Kv5-251976013113-971103	971103B-244k-customCGH	252042110167-244k	68	1	0	2	2	1	74	1	74	LumA	LumA	GSM904716	GSM899767	GPL8269	GPL15359
982079B	Test 251976011587 244Kv5	982079B-244k-customCGH	252042110156-244k	76	1	1	2	2	1	40	1	40	LumA	LumA	GSM904708	GSM899770	GPL8269	GPL15359
982118B-244Kv5	H244Kv5-251976013128-982118	982118B-244k-customCGH	252042110157-244k	50	1	0	1	2	0	128	0	128	LumA	LumA	GSM904717	GSM899771	GPL8269	GPL15359
990357B	Test 251976011588 244Kv5	990357B-244k-customCGH	252042110159-244k	46	0	1	3	1	0	123	0	123	Her2	Her2	GSM904709	GSM899773	GPL8269	GPL15359
A12-5 LN Met	H1AUNC44K-H1-0073	A12-5 LNMet-244k-customCGH	252042110111-244k	64	1	1	3	3	0	46	0	46	LumB	LumB	GSM635404	GSM899641	GPL5325	GPL15359
A15-1LN-Met	H1AUNC44K-H1-0660	A15-1 LNMet-244k-customCGH	252042110117-244k	NA	NA	NA	NA	NA	NA	NA	NA	NA	Basal	Basal	GSM904700	GSM899647	GPL5325	GPL15359
A7-LiverMet	H1AUNC44K-H1-0528	A7-1 LivMet-244k-customCGH-repeat	252042110063-244k	58	0	1	3	3	1	17	1	25	Basal	Basal	GSM635399	GSM899617	GPL5325	GPL15359
A9-1 Liver Tumor	H1AUNC-0814-C-A9-1	A9-LivMet-244k-customCGH	252042110114-244k	NA	NA	NA	NA	NA	NA	NA	NA	NA	LumA	LumA	GSM141060	GSM899644	GPL1390	GPL15359
Sum 102_C	H1AUNC_10122	SUM102-244k-customCGH	252042110041-244k	NA	NA	NA	NA	NA	NA	NA	NA	NA			GSM904718	GSM898611	GPL1390	GPL15359
Sum 149_C	H1AUNC_10123	SUM149-244k-customCGH	252042110042-244k	NA	NA	NA	NA	NA	NA	NA	NA	NA			GSM904719	GSM898612	GPL1390	GPL15359
UNC03-0477B-44K	H1AUNC44K-H1-0570	030477B-244k-customCGH	252042110104-244k	83	1	1	2	2	1	9	1	39	LumB	LumB	GSM871155	GSM899637	GPL5325	GPL15359
UNC98-2048B-44K	H1AUNC44K-H1-0551	982048B-repeat-244k-customCGH	252042110169-244k	72	1	0	3	3	1	2	1	60	LumA	LumA	GSM871161	GSM899768	GPL5325	GPL15359
UNC98-2049B-44K	H1AUNC44K-H1-0561	982049B-repeat-244k-customCGH	252042110155-244k	72	1	1	3	2	1	2	1	60	LumA	LumA	GSM871162	GSM899769	GPL5325	GPL15359
UNC99-0141B-44K	H1AUNC44K-H1-0562	990141B-244k-customCGH	252042110112-244k	47	0	1	3	3	1	4	1	9	Basal	Basal	GSM871163	GSM899642	GPL5325	GPL15359
UNC99-0276B-44K	H1AUNC44K-H1-0536-Na	990276B1-244k-customCGH	252042110158-244k	50	0	1	3	2	1	5	1	10	Claudin	Normal	GSM904699	GSM899772	GPL5325	GPL15359
UNC99-0543B-44K	H1AUNC44K-H1-0553	990543B-repeat-244k-customCGH	252042110160-244k	40	1	1	1	2	1	17	1	93	LumA	LumA	GSM871170	GSM899774	GPL5325	GPL15359
UNC02-0575B-44K	H1AUNC44K-H1-0407	020575B-244k-customCGH	252042110103-244k	42	1	1	2	2	1	7	1	18	LumB	LumB	GSM871154	GSM899636	GPL5325	GPL15359

## Sheet: Sheet2
-2127	BC00063	Agilent array	Breast	H1A9529-041C	BC00063	H1A9529-041C
-2125	BC00041	Agilent array	Breast	H1A9529-039C	BC00041	H1A9529-039C
-2089	BR00-0365	Agilent array	Breast	H1A_013Na_C	BR00-0365	H1A_013Na_C
-2019	BC00085	Agilent array	Breast	H1A6260-732	BC00085	H1A6260-732
-1333	SKBR3	Agilent array	cell line	H1A5363_775	SKBR3	H1A5363_775
33937	BC00083	Agilent array	Breast	H1A6546-126	BC00083	H1A6546-126
34073	030311-BC-Brain-Met	Agilent array	Breast	H1A6730-744	030311-BC-Brain-Met	H1A6730-744
34095	BR00-0387	Agilent array	Breast	H1A9529-025C_Na	BR00-0387	H1A9529-025C_Na
34096	BR00-0344	Agilent array	Breast	H1A9529-028C_Na	BR00-0344	H1A9529-028C_Na
34237	BC00082T	Agilent array	Breast	H1A4110_3580	BC00082T	H1A4110_3580
34238	BC00094T	Agilent array	Breast	H1A4110_3582	BC00094T	H1A4110_3582
34325	BR00-0572-VIM	Agilent array	Breast	H1A6433-2599V2	BR00-0572-VIM	H1A6433-2599V2
34361	BR97-0137-VIM	Agilent array	Breast	H1A6261-1489V2	BR97-0137-VIM	H1A6261-1489V2
34383	BC00086	Agilent array	Breast	H1A6261-2087V2	BC00086	H1A6261-2087V2
34398	BR00-0284	Agilent array	Breast	H1A6433-2611V2	BR00-0284	H1A6433-2611V2
34403	BR00-0504	Agilent array	Breast	H1A6433-2988V2	BR00-0504	H1A6433-2988V2
34410	BR00-0587-GATA3	Agilent array	Breast	H1A6433-2990V2	BR00-0587-GATA3	H1A6433-2990V2
34580	A4-LLL-Lung-Met	Agilent array	Breast	H1A6912-6852V2	A4-LLL-Lung-Met	H1A6912-6852V2
34581	A5-Skin#1-Right-Met	Agilent array	Breast	H1A6912-6853V2	A5-Skin#1-Right-Met	H1A6912-6853V2
34636	BR95-0184	Agilent array	Breast	H1A6912-6986V2	BR95-0184	H1A6912-6986V2
34852	BC00024T	Agilent array	Breast	H1A_C_0077	BC00024T	H1A_C_0077
34853	BC00029T	Agilent array	Breast	H1A_C_0078	BC00029T	H1A_C_0078
34855	BC00043T	Agilent array	Breast	H1A_C_0080	BC00043T	H1A_C_0080
34864	BC00097	Agilent array	Breast	H1A9529-0091C	BC00097	H1A9529-0091C
34867	A1-17-Left-Primary-VIM	Agilent array	Breast	H1A9529-0094C	A1-17-Left-Primary-VIM	H1A9529-0094C
34869	BC00070	Agilent array	Breast	H1A9529-0096C	BC00070	H1A9529-0096C
34919	BR01-0349	Agilent array	Breast	H1A9529-0047C	BR01-0349	H1A9529-0047C
34924	BR99-0348-GATA3	Agilent array	Breast	H1A9529-0051C	BR99-0348-GATA3	H1A9529-0051C
35127	BR99-0207-GATA3	Agilent array	Breast	H1A7411-0066-C	BR99-0207-GATA3	H1A7411-0066-C
36381	9830-000248B	Agilent array	Breast9830	H1AUNC-0997-C	9830-000248B	H1AUNC-0997-C
36382	9830-000424B	Agilent array	Breast9830	H1AUNC-0998-C	9830-000424B	H1AUNC-0998-C
36383	9830-000471B	Agilent array	Breast9830	H1AUNC-1000-C	9830-000471B	H1AUNC-1000-C
36384	9830-000517B	Agilent array	Breast9830	H1AUNC-1004-C	9830-000517B	H1AUNC-1004-C
36385	9830-010118B	Agilent array	Breast9830	H1AUNC-1005-C	9830-010118B	H1AUNC-1005-C
36386	9830-010130B	Agilent array	Breast9830	H1AUNC-1006-C	9830-010130B	H1AUNC-1006-C
36387	9830-010214B	Agilent array	Breast9830	H1AUNC-1007-C	9830-010214B	H1AUNC-1007-C
36399	9830-020185B	Agilent array	Breast9830	H1AUNC-1010-C	9830-020185B	H1AUNC-1010-C
36400	9830-020310B	Agilent array	Breast9830	H1AUNC-1011-C	9830-020310B	H1AUNC-1011-C
36413	9830-000060B	Agilent array	Breast9830	H1AUNC-1012-C	9830-000060B	H1AUNC-1012-C
36415	9830-020340B	Agilent array	Breast9830	H1AUNC-1014-C	9830-020340B	H1AUNC-1014-C
36416	9830-020416B	Agilent array	Breast9830	H1AUNC-1015-C	9830-020416B	H1AUNC-1015-C
36425	9830-010255B	Agilent array	Breast9830	H1AUNC-1016-C	9830-010255B	H1AUNC-1016-C
36426	9830-010384B	Agilent array	Breast9830	H1AUNC-1017-C	9830-010384B	H1AUNC-1017-C
36427	9830-020018B	Agilent array	Breast9830	H1AUNC-1018-C	9830-020018B	H1AUNC-1018-C
36434	9830-020461B	Agilent array	Breast9830	H1AUNC-0933-C	9830-020461B	H1AUNC-0933-C
36437	9830-030446B	Agilent array	Breast9830	H1AUNC-0935-C	9830-030446B	H1AUNC-0935-C
36862	A8-Caudaequina-Met	Agilent array	Breast	H1A4956V2_Na	A8-Caudaequina-Met	H1A4956V2_Na
36868	A6-Liver-Met	Agilent array	Breast	H1A7871-2410V2	A6-Liver-Met	H1A7871-2410V2
36961	BR-99-0622	Agilent array	Breast	HIA-7871-V2-2253	BR-99-0622	HIA-7871-V2-2253
37233	BC00016-T	Agilent array	Breast	H1AUNC-0788-C	BC00016-T	H1AUNC-0788-C
37235	BC00017-T	Agilent array	Breast	H1AUNC-0789-C	BC00017-T	H1AUNC-0789-C
38475	A9-1 Liver Tumor	Agilent array	Breast	H1AUNC-0814-C-A9-1	A9-1 Liver Tumor	H1AUNC-0814-C-A9-1
41124	9830-030118B	Agilent array	Breast9830	A44K10829-1192	9830-030118B	A44K10829-1192
41125	9830-030584B	Agilent array	Breast9830	A44K10829-1281	9830-030584B	A44K10829-1281
41128	9830-030399B	Agilent array	Breast9830	A44K11240-2741	9830-030399B	A44K11240-2741
41230	00-0161B-Genomic-Core	Agilent array	Breast	H1AUNC-1121C	00-0161B-Genomic-Core	H1AUNC-1121C
41232	010348B-Genomic-Core	Agilent array	Breast	H1AUNC-1123C	010348B-Genomic-Core	H1AUNC-1123C
41233	010353B-Genomic-Core	Agilent array	Breast	H1AUNC-1124C	010353B-Genomic-Core	H1AUNC-1124C
41234	010456B-Genomic-Core	Agilent array	Breast	H1AUNC-1125C	010456B-Genomic-Core	H1AUNC-1125C
41832	UNC-010208B	Agilent array	Breast	H1AUNC-0761-C-Na	UNC-010208B	H1AUNC-0761-C-Na
41836	UNC-010509B	Agilent array	Breast	H1AUNC-0765-C-Na	UNC-010509B	H1AUNC-0765-C-Na
42401	UNC-030065B	Agilent array	Breast	H1AUNC-1239-C	UNC-030065B	H1AUNC-1239-C
42404	UNC-030459B-BRCA1	Agilent array	Breast	H1AUNC-1242-C	UNC-030459B-BRCA1	H1AUNC-1242-C
42577	UNC-040134B	Agilent array	Breast	H1AUNC-1235-C	UNC-040134B	H1AUNC-1235-C
43005	UNC-020242B	Agilent array	Breast	H1AUNC-1317-C	UNC-020242B	H1AUNC-1317-C
43009	UNC-020510B..	Agilent array	Breast	H1AUNC-1322-C	UNC-020510B..	H1AUNC-1322-C
43010	UNC-040182B	Agilent array	Breast	H1AUNC-1323-C	UNC-040182B	H1AUNC-1323-C
43087	UNC-040114B-core	Agilent array	Breast	H1AUNC-1088-C-Na	UNC-040114B-core	H1AUNC-1088-C-Na
43089	UNC-030408B-core	Agilent array	Breast	H1AUNC-1090-C-Na	UNC-030408B-core	H1AUNC-1090-C-Na
44425	normalbreast-BR00-0572A	Agilent array	Breast	H1AUNC-1526-C	normalbreast-BR00-0572A	H1AUNC-1526-C
44426	normalbreast-BR00-0587A	Agilent array	Breast	H1AUNC-1527-C	normalbreast-BR00-0587A	H1AUNC-1527-C
45325	A12-5 LN Met	Agilent array	Breast	H1AUNC44K-H1-0073	A12-5 LN Met	H1AUNC44K-H1-0073
48322	UNC02-0575B-244K10ug	Agilent array	Breast	H1AUNC244K-0187	UNC02-0575B-244K10ug	H1AUNC244K-0187
48420	UNC98-2049B-244K	Agilent array	Breast	H1AUNC244K-0189	UNC98-2049B-244K	H1AUNC244K-0189
48422	UNC99-0141B-244K	Agilent array	Breast	H1AUNC244K-0190	UNC99-0141B-244K	H1AUNC244K-0190
48628	UNC03-0477B-244K	Agilent array	Breast	H1AUNC244K-0275	UNC03-0477B-244K	H1AUNC244K-0275
48629	UNC98-2048B-244K	Agilent array	Breast	H1AUNC244K-0276	UNC98-2048B-244K	H1AUNC244K-0276
48631	UNC99-0543B-244K	Agilent array	Breast	H1AUNC244K-0278	UNC99-0543B-244K	H1AUNC244K-0278
48689	UNC00-0552B-44K	Agilent array	Breast	H1AUNC44K-H1-0559	UNC00-0552B-44K	H1AUNC44K-H1-0559
52448	UNC99-0276B-44K	Agilent array	Breast	H1AUNC44K-H1-0536-Na	UNC99-0276B-44K	H1AUNC44K-H1-0536-Na
53536	A15-MediastinalMet	Agilent array	Breast	H1AUNC44K-H1-0543Na	A15-MediastinalMet	H1AUNC44K-H1-0543Na
54881	BABE-cell line-244k	Agilent array	Breast	251976010121-244k	BABE-cell line-244k	251976010121-244k
54882	ME16C2-cell line-244k	Agilent array	Breast	251976010122-244k	ME16C2-cell line-244k	251976010122-244k
54883	MCF-7-cell line-244k	Agilent array	Breast	251976010123-244k	MCF-7-cell line-244k	251976010123-244k
54884	ZR75-1-cell line-244k	Agilent array	Breast	251976010124-244k	ZR75-1-cell line-244k	251976010124-244k
54886	SUM102-cell line-244k	Agilent array	Breast	251976010126-244k	SUM102-cell line-244k	251976010126-244k
54887	SUM149-cell line-244k	Agilent array	Breast	251976010127-244k	SUM149-cell line-244k	251976010127-244k
57311	MDA-MB231 cell line -1	Agilent array	Agilent array	251976010441-244K	MDA-MB231 cell line -1	251976010441-244K
57312	SUM159 cell line	Agilent array	Agilent array	251976010442-244K	SUM159 cell line	251976010442-244K
57313	T47D cell line	Agilent array	Agilent array	251976010443-244K	T47D cell line	251976010443-244K
59089	SUM1315 cell line	Agilent array	Agilent array	251510210279-3-4X44K	SUM1315 cell line	251510210279-3-4X44K
59756	960047B-4x44K-AgS	Agilent array	Breast	H1AUNC4x44K--0287-1-960047B	960047B-4x44K-AgS	H1AUNC4x44K--0287-1-960047B
59760	970055B-4x44K-AgSw	Agilent array	Breast	H1AUNC4x44K--0288-1-970055B	970055B-4x44K-AgSw	H1AUNC4x44K--0288-1-970055B
59761	970105B-4x44K-AgS	Agilent array	Breast	H1AUNC4x44K--0288-2-970105B	970105B-4x44K-AgS	H1AUNC4x44K--0288-2-970105B
59767	971103B-4x44K-AgS	Agilent array	Breast	H1AUNC4x44K--0289-4-971103B	971103B-4x44K-AgS	H1AUNC4x44K--0289-4-971103B
59797	982118B-4x44k-AgS	Agilent array	Breast	H1AUNC4x44K--0285-4-982118B	982118B-4x44k-AgS	H1AUNC4x44K--0285-4-982118B
61794	950165B	TCGA	Test	Agilent 251976011250 244Kv5	950165B	Agilent 251976011250 244Kv5
61796	960096B	TCGA	Test	Agilent 251976011252 244Kv5	960096B	Agilent 251976011252 244Kv5
61797	940326B	TCGA	Test	Agilent 251976011245 244Kv5	940326B	Agilent 251976011245 244Kv5
61798	960606B	TCGA	Test	Agilent 251976011253 244Kv5	960606B	Agilent 251976011253 244Kv5
61800	941025B	TCGA	Test	Agilent 251976011254 244Kv5	941025B	Agilent 251976011254 244Kv5
61801	950094B	TCGA	Test	Agilent 251976011248 244Kv5	950094B	Agilent 251976011248 244Kv5
61802	950185B	TCGA	Test	Agilent 251976011255 244Kv5	950185B	Agilent 251976011255 244Kv5
61803	950105B	TCGA	Test	Agilent 251976011249 244Kv5	950105B	Agilent 251976011249 244Kv5
62724	982079B	TCGA	Test	Test 251976011587 244Kv5	982079B	Test 251976011587 244Kv5
62725	990357B	TCGA	Test	Test 251976011588 244Kv5	990357B	Test 251976011588 244Kv5
62726	010349A	TCGA	Test	Test 251976011602 244Kv5	010349A	Test 251976011602 244Kv5
62732	971069B	TCGA	Test	Test 251976011605 244Kv5	971069B	Test 251976011605 244Kv5
62733	971091B	TCGA	Test	Test 251976011606 244Kv5	971091B	Test 251976011606 244Kv5
62735	100% 971083B	TCGA	Test	Test 251976011599 244Kv5	100% 971083B	Test 251976011599 244Kv5
62736	980019B	TCGA	Test	Test 251976011607 244Kv5	980019B	Test 251976011607 244Kv5
63493	9830-040550A-244Kv5	Agilent array	Breast9830	251976010062-244K-V5	9830-040550A-244Kv5	251976010062-244K-V5
64647	A7-1 LiverMet 244Kv5	Agilent array	Breast	Breast 251976012132 244Kv5	A7-1 LiverMet 244Kv5	Breast 251976012132 244Kv5
	HUZI11	2005-11-01
	HUZI11	2005-11-01
	HOADLEY	2010-04-21
	HUZI11	2005-11-01
	HUZI11	2005-11-01
	HUZI11	2003-11-10
	HOADLEY	2010-04-20
	HOADLEY	2010-04-13
	HOADLEY	2010-04-13
	HOADLEY	2010-04-13
	HOADLEY	2010-04-13
	HOADLEY	2010-04-13
	HOADLEY	2010-04-13
	XIAPING	2009-09-30
	HOADLEY	2010-04-13
	HOADLEY	2010-04-13
	XIAPING	2009-09-30
	XIAPING	2009-09-30
	HOADLEY	2010-04-21
	HOADLEY	2010-04-21
	XIAPING	2009-09-30
	HOADLEY	2010-04-22
	HOADLEY	2010-04-22
	XIAPING	2009-09-09
	XIAPING	2004-08-05
	XIAPING	2004-07-26
	XIAPING	2004-07-26
	XIAPING	2004-07-26
	XIAPING	2004-07-26
	XIAPING	2004-07-28
	XIAPING	2004-07-28
	XIAPING	2004-07-28
	XIAPING	2004-08-10
	XIAPING	2004-08-10
	XIAPING	2004-08-10
	XIAPING	2004-08-03
	XIAPING	2004-08-03
	XIAPING	2004-08-05
	XIAPING	2004-08-05
	XIAPING	2004-08-12
	XIAPING	2005-09-01
	XIAPING	2005-09-01
	XIAPING	2004-08-12
	XIAPING	2005-09-01
	XIAPING	2010-07-22
	HOADLEY	2010-04-22
	HUZI11	2004-02-16
	XIAPING	2006-10-23
	XIAPING	2008-05-22
	HUZI11	2004-01-08
	HUZI11	2004-01-08
	HUZI11	2004-09-29
	HOADLEY	2010-08-27
	HUZI11	2004-09-29
	XIAPING	2005-02-23
	GHCHAO	2008-09-11
	XIAPING	2004-10-25
	XIAPING	2004-10-25
	CPEROU	2004-02-16
	CPEROU	2004-02-16
	HUZI11	2003-10-22
	CPEROU	2004-02-16
	HUZI11	2003-10-22
	HUZI11	2004-02-16
	CPEROU	2003-11-06
	HUZI11	2003-10-22
	HUZI11	2003-10-08
	HUZI11	2003-12-03
	CPEROU	2003-11-06
	HUZI11	2004-02-16
	GKARACA	2004-09-30
	HUZI11	2003-12-03
	HUZI11	2003-11-12
	CPEROU	2003-10-15
	HUZI11	2003-11-14
	HUZI11	2003-12-03
	HUZI11	2003-11-25
	HUZI11	2003-12-03
	HUZI11	2004-02-19
	HUZI11	2004-01-15
	HUZI11	2003-12-03
	HUZI11	2004-03-05
	HUZI11	2004-02-19
	GHCHAO	2008-09-11
	APRAT	2009-03-23
	GHCHAO	2008-09-11
	XIAPING	2006-08-23
	XIAPING	2006-08-23
	XIAPING	2003-06-18
	GHCHAO	2008-09-11
	APRAT	2009-08-25
	GHCHAO	2008-09-11
	APRAT	2009-03-23
	APRAT	2009-03-23
	XIAPING	2006-01-09
	XIAPING	2005-12-15
	XIAPING	2006-03-23
	XIAPING	2006-03-23
	XIAPING	2006-01-26
	XIAPING	2006-03-06
	XIAPING	2006-01-26
	XIAPING	2006-03-06
	XIAPING	2006-02-06
	XIAPING	2006-03-23
	XIAPING	2007-07-17
	GHCHAO	2007-05-24
	GHCHAO	2007-07-12
	GHCHAO	2007-07-12
	GHCHAO	2007-06-18
	GHCHAO	2007-06-18
	XIAPING	2008-02-26
	GHCHAO	2007-07-12
	GHCHAO	2008-09-11
